# Supplementary material for: Metformin treatment results in distinctive skeletal muscle mitochondrial remodeling in rats with different intrinsic aerobic capacities
Source: PubMed Central journal article supplement (PMC11488331; doi:10.1111/acel.14235), 2024-06-24
Supplement: ACEL-23-e14235-s001.pdf [file ACEL-23-e14235-s001.pdf]

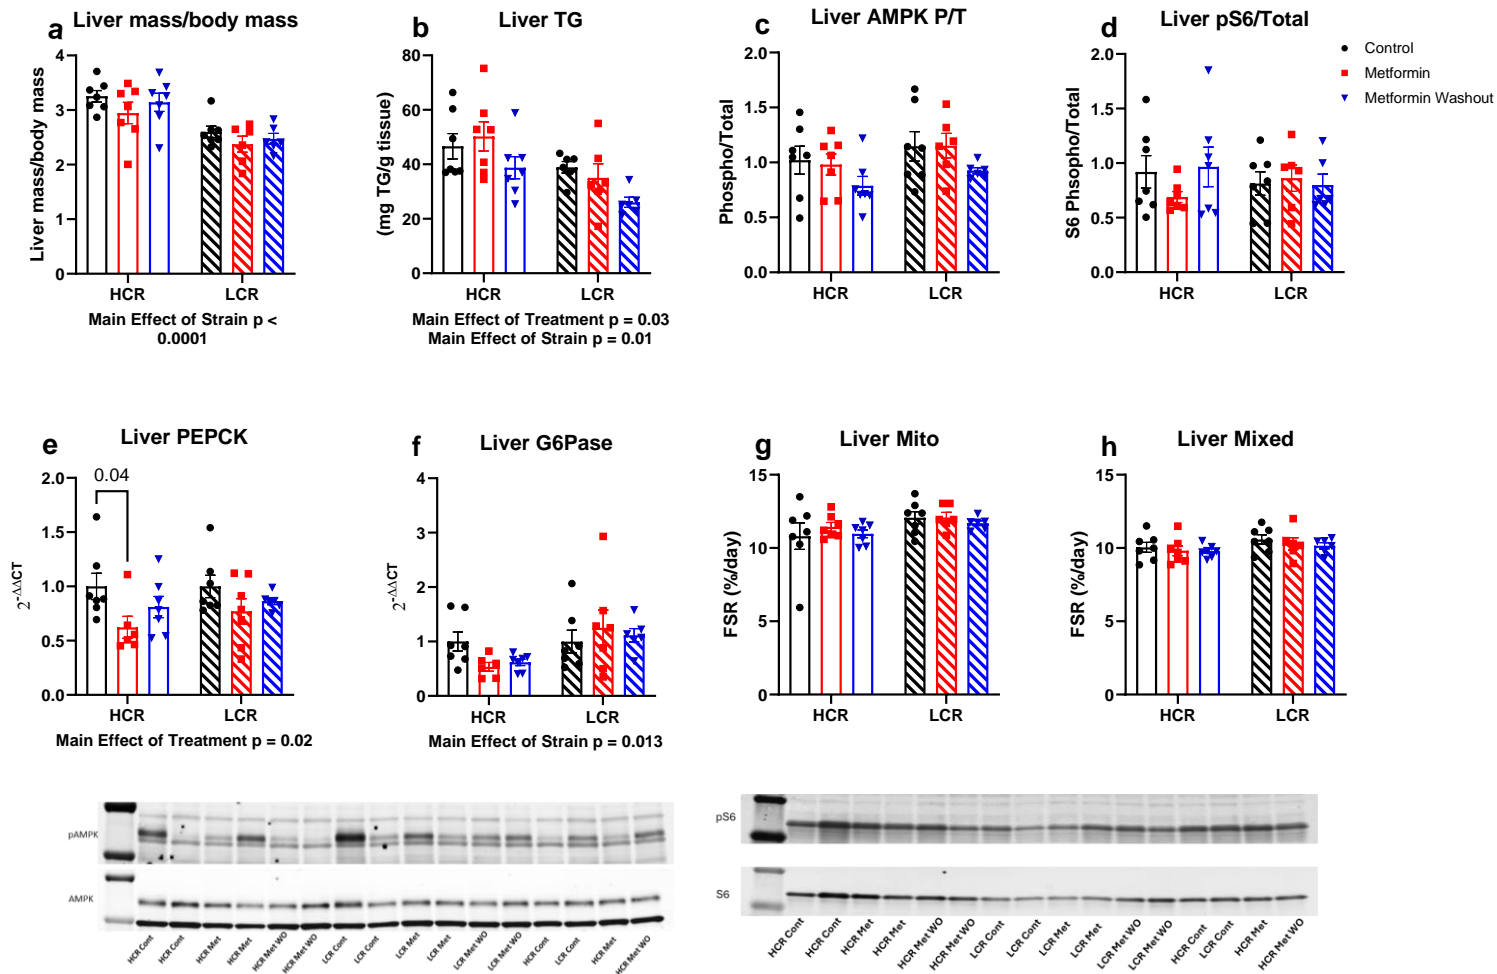

**Extended Data Figure 2:** **a**, Liver mass, **b**, triglyceride content, **c**, AMPK phospho (Thr172) to total ratio and **d**, S6 phospho (Ser235/236) to total ratio. Gene expression of liver **e**, PEPCK and **f**, G6Pase. Determination of the fractional synthesis rates in the **g**, mitochondrial and **h**, mixed fractions of liver. Data were analyzed by two-way ANOVA (strain x treatment) and are represented as mean  $\pm$  SEM from 6-7 rats per group.
