# Supplementary material for: Metformin treatment results in distinctive skeletal muscle mitochondrial remodeling in rats with different intrinsic aerobic capacities
Source: PubMed Central journal article supplement (PMC11488331; doi:10.1111/acel.14235), 2024-06-24
Supplement: ACEL-23-e14235-s005.pdf [file ACEL-23-e14235-s005.pdf]

| Complex 1 |                       |     | Complex 3 |                      |     |
|-----------|-----------------------|-----|-----------|----------------------|-----|
| Protein   | Peptide               | NEH | Protein   | Peptide              | NEH |
| Ndufa2    | AHPDLPILIR            | 20  | Cytb      | DVNYGWLIR            | 11  |
| Ndufa2    | NVSLNLSAAEVTK         | 25  | Cyc1      | GLLSLDHTSIR          | 21  |
| Ndufa3    | ATPYNYVPVPR           | 19  | Uqcr1     | NNGAGYFLEHLAFK       | 25  |
| Ndufa4    | LGPNEQYK              | 16  | Uqcr1     | SGMFWLR              | 10  |
| Ndufa4    | FYSVNVDYSK            | 11  | Uqcr1     | NALISHLDGTTVCEDIGR   | 35  |
| Ndufa5    | KLENLLQGGEEVEVILQAEK  | 43  | Uqcr2     | ITSEELHYFVQNHFTSAR   | 35  |
| Ndufa5    | LTIlyTK               | 3   | Uqcr2     | NALANPLYCPDYR        | 25  |
| Ndufa6    | VVDLLVIK              | 6   | Uqcrb     | RLPENLYNDR           | 20  |
| Ndufa6    | FFHETETPRPK           | 20  | Uqcrh     | SQTEEDCTEELDFDLHAR   | 40  |
| Ndufa7    | TAESSAVAATK           | 26  | Uqcrfs1   | EIDQEAAVEVSQLR       | 38  |
| Ndufa7    | EVVPPSIIMSSQK         | 25  | Uqcrfs1   | SGFPAPVLSATSR        | 28  |
| Ndufa7    | NWASGQDLQAK           | 25  | Uqcr10    | AFDQGADAVDYINEGK     | 34  |
| Ndufa8    | VSSAVLK               | 11  | Uqcr10    | LYSLLFR              | 8   |
| Ndufa8    | LVNGCALNFFR           | 17  | Uqcr11    | LILDWVYPYINGK        | 13  |
| Ndufa9    | NFDFEDVFNIPR          | 20  | Uqcc2     | FAPTRPEEK            | 21  |
| Ndufa9    | FLNHFANYR             | 15  | Ttc19     | DEFSVQHIR            | 20  |
| Ndufa10   | VVEDIEYLNYNK          | 17  | Complex 4 |                      |     |
| Ndufa10   | YGLLASILGDK           | 16  | Protein   | Peptide              | NEH |
| Ndufa11   | LEGWELFATPK           | 18  | Mtco1     | VFSWLATLHGGNIK       | 19  |
| Ndufa12   | FNVSATPEQYVPYSTTR     | 30  | Mtco2     | VVLPMEPIR            | 17  |
| Ndufb5    | TLAILQIESEK           | 22  | Mtco2     | TDAIPGR              | 15  |
| Ndufb6    | FWNNFLR               | 8   | Cox4i1    | DYPLPDVAHVK          | 18  |
| Ndufb7    | DYCAHYLIR             | 16  | Cox4i1    | ADWSSLSR             | 17  |
| Ndufb10   | ELEQFTQVSK            | 20  | Cox5a     | LNDFASAVR            | 19  |
| Ndufb10   | VDQEIIINIQER          | 27  | Cox5b     | ASGGGVPTDEEQATGLER   | 44  |
| Ndufb10   | RTPAPSPQTSIPNPITYLTK  | 35  | Cox5b     | GVGALAAQALR          | 29  |
| Ndufb11   | AVIAPSGVER            | 24  | Cox6a2    | GDHGGAGANTWR         | 26  |
| Ndufc2    | TYAEILEPFHPVR         | 26  | Cox6b1    | TAPFDSR              | 15  |
| Nd1       | YSLFGALR              | 14  | Cox6b1    | NCWQNYLDFHR          | 18  |
| Nd4       | VSIILDPLTK            | 11  | Cox6b1    | GGDVSVCEWYR          | 19  |
| Nd5       | STSITQQLSK            | 18  | Cox6b1    | SLCPVSWVSAWDDR       | 25  |
| Ndufs1    | FEAPLFNAR             | 21  | Cox6b1    | IAEGTFPGK            | 16  |
| Ndufs1    | VALIGSPVDLYR          | 20  | Cox6c     | AYADFYR              | 14  |
| Ndufs2    | VLFGIETR              | 12  | Complex 5 |                      |     |
| Ndufs3    | SLADLTAVDVPTTR        | 23  | Protein   | Peptide              | NEH |
| Ndufs3    | VVAEPVELAQEFR         | 32  | Atp5a1    | FESAFLSHVVSQHQSLGNIR | 43  |
| Ndufs5    | LGISLDR               | 12  | Atp5a1    | HALIIYDDLK           | 17  |
| Ndufs5    | HFIFLSAEQPYK          | 23  | Atp5a1    | TSIAIDIINQK          | 19  |
| Ndufs6    | TGTCGYCGLQFK          | 15  | Atp5a1    | TGTAEMSSILEER        | 29  |
| Ndufs7    | LDDLINWAR             | 15  | Atp5b     | FLSQPFQVAEVFTGHMGK   | 32  |
| Ndufs7    | AHQSVAAATGSPSSTQSAVSK | 49  | Atp5b     | EGNDLYHEMIESGVINLK   | 32  |
| Ndufs7    | QADVMIIVAGTLTK        | 22  | Atp5c1    | VYGTGSLALYEK         | 18  |
| Ndufv1    | YLVVNADEGEPGCK        | 26  | Atp5c1    | LTLTFNR              | 7   |
| Ndufv1    | NACDSYDFDVVVR         | 23  | Atp5c1    | THSDQFLVSFK          | 16  |
| Ndufv2    | DSDSILETLQR           | 22  | Atp5d     | AQSELSGADEAAR        | 45  |
| Ndufv2    | AAAVLPVLDLAQR         | 30  | Atp5d     | IEANEALVK            | 20  |
| Complex 2 |                       |     | Atp5e     | FSQICAK              | 14  |
| Protein   | Peptide               | NEH | Atp5f1    | PLPPLPEYGGK          | 20  |
| SdhA      | GEGGILINSQGER         | 30  | Atp5f1    | NNIALALEVTYR         | 22  |
| SdhA      | VSQLYGDLQHLK          | 20  | Atp5h     | LASLSEKPPAIDWAYR     | 35  |
| SdhB      | SIEPYLK               | 11  | Atp5h     | SWNETFHTR            | 15  |
| SdhB      | DEFTEER               | 17  | Atp5h     | NCAQFVTGSQAR         | 28  |
| SdhC      | NTSSNRPVSPHLTIYR      | 29  | Atp5i     | VPPVQVSPLIK          | 18  |
|           |                       |     | Atp5i     | ELAEAEVDSIFK         | 27  |
|           |                       |     | Atp5j2    | DFTPSGIAGAFR         | 24  |
|           |                       |     | Atp5j2    | ELPSWILMR            | 15  |
|           |                       |     | Atp5l     | LATFWHYAR            | 15  |
|           |                       |     | Atp5o     | LVRPPVQVYIEGR        | 27  |

**Supplemental Table 1:** Validation peptides and number of exchangeable hydrogens (NEH).
