# Supplementary material for: Metformin treatment results in distinctive skeletal muscle mitochondrial remodeling in rats with different intrinsic aerobic capacities
Source: PubMed Central journal article supplement (PMC11488331; doi:10.1111/acel.14235), 2024-06-24
Supplement: ACEL-23-e14235-s006.pdf [file ACEL-23-e14235-s006.pdf]

## Soleus Synthesis Rates (k(1/day))

|         | HCR Con        |  | HCR MET           |  | HCRWO             |  | LCR Con        |  | LCR MET           |  | LCRWO             |  |
|---------|----------------|--|-------------------|--|-------------------|--|----------------|--|-------------------|--|-------------------|--|
| Ndufa2  | 0.0005 ± 0.000 |  | 0.0000 ± 0.000    |  | 0.0259 ± 0.007 ‡  |  | 0.0000 ± 0.000 |  | 0.0124 ± 0.006 \$ |  | 0.0304 ± 0.015 ‡  |  |
| Ndufa4  | 0.0867 ± 0.014 |  | 0.0897 ± 0.016    |  | 0.0866 ± 0.013    |  | 0.1021 ± 0.033 |  | 0.1131 ± 0.025    |  | 0.1003 ± 0.020    |  |
| Ndufa5  | 0.0448 ± 0.022 |  | 0.0321 ± 0.010    |  | 0.0257 ± 0.004    |  | 0.0462 ± 0.004 |  | 0.0434 ± 0.026    |  | 0.0306 ± 0.007    |  |
| Ndufa6  | 0.1138 ± 0.006 |  | 0.1115 ± 0.008    |  | 0.1225 ± 0.009    |  | 0.0685 ± 0.008 |  | 0.1285 ± 0.015 \$ |  | 0.1221 ± 0.011 \$ |  |
| Ndufa7  | 0.0575 ± 0.005 |  | 0.0724 ± 0.008 \$ |  | 0.1020 ± 0.016 ‡  |  | 0.0773 ± 0.014 |  | 0.0947 ± 0.011 \$ |  | 0.1140 ± 0.006 ‡  |  |
| Ndufa8  | 0.0273 ± 0.008 |  | 0.0199 ± 0.008    |  | 0.0274 ± 0.010    |  | 0.0207 ± 0.009 |  | 0.0254 ± 0.011 \$ |  | 0.0299 ± 0.008 †  |  |
| Ndufa9  | 0.0747 ± 0.020 |  | 0.0678 ± 0.025    |  | 0.0628 ± 0.017    |  | 0.0612 ± 0.020 |  | 0.1220 ± 0.068    |  | 0.0743 ± 0.021    |  |
| Ndufa10 | 0.0586 ± 0.010 |  | 0.0655 ± 0.015    |  | 0.0670 ± 0.011    |  | 0.0654 ± 0.034 |  | 0.0643 ± 0.015    |  | 0.0664 ± 0.014    |  |
| Ndufa11 | 0.0795 ± 0.012 |  | 0.1179 ± 0.024 \$ |  | 0.1033 ± 0.011    |  | 0.1218 ± 0.013 |  | 0.0857 ± 0.032 \$ |  | 0.1179 ± 0.009 †  |  |
| Ndufa12 | 0.0421 ± 0.008 |  | 0.0591 ± 0.008 \$ |  | 0.0499 ± 0.004    |  | 0.0431 ± 0.006 |  | 0.0673 ± 0.011 \$ |  | 0.0624 ± 0.009 \$ |  |
| Ndufa13 | 0.0627 ± 0.007 |  | 0.0751 ± 0.019    |  | 0.0489 ± 0.008 †  |  | 0.0594 ± 0.008 |  | 0.0686 ± 0.017    |  | 0.0766 ± 0.006 \$ |  |
| Ndufb5  | 0.0299 ± 0.004 |  | 0.0294 ± 0.004    |  | 0.0381 ± 0.004 ‡  |  | 0.0296 ± 0.004 |  | 0.0543 ± 0.005 \$ |  | 0.0460 ± 0.004 ‡  |  |
| Ndufb7  | 0.0509 ± 0.008 |  | 0.0516 ± 0.012    |  | 0.0789 ± 0.015 ‡  |  | 0.0691 ± 0.013 |  | 0.0755 ± 0.017    |  | 0.0912 ± 0.024 \$ |  |
| Ndufb10 | 0.0302 ± 0.015 |  | 0.0156 ± 0.015    |  | 0.0270 ± 0.018    |  | 0.0256 ± 0.025 |  | 0.0377 ± 0.020    |  | 0.0309 ± 0.011    |  |
| Ndufb11 | 0.0285 ± 0.004 |  | 0.0258 ± 0.004    |  | 0.0334 ± 0.002 †  |  | 0.0226 ± 0.004 |  | 0.0321 ± 0.004 \$ |  | 0.0357 ± 0.002 \$ |  |
| Ndufc2  | 0.0409 ± 0.004 |  | 0.0330 ± 0.004 \$ |  | 0.0414 ± 0.004 ‡  |  | 0.0327 ± 0.004 |  | 0.0406 ± 0.007 \$ |  | 0.0462 ± 0.003 ‡  |  |
| Nd1     | 0.0158 ± 0.003 |  | 0.0251 ± 0.010    |  | 0.0325 ± 0.010 \$ |  | 0.0157 ± 0.002 |  | 0.0297 ± 0.017 \$ |  | 0.0352 ± 0.012 \$ |  |
| Nd4     | 0.0074 ± 0.004 |  | 0.0035 ± 0.002    |  | 0.0173 ± 0.009 ‡  |  | 0.0000 ± 0.000 |  | 0.0000 ± 0.000    |  | 0.0134 ± 0.007 ‡  |  |
| Nd5     | 0.0284 ± 0.007 |  | 0.0312 ± 0.010    |  | 0.0486 ± 0.002 ‡  |  | 0.0345 ± 0.005 |  | 0.0324 ± 0.009    |  | 0.0519 ± 0.001 ‡  |  |
| Ndufs1  | 0.0633 ± 0.008 |  | 0.0590 ± 0.011    |  | 0.0663 ± 0.009    |  | 0.0552 ± 0.007 |  | 0.0694 ± 0.010 \$ |  | 0.0759 ± 0.011 \$ |  |
| Ndufs2  | 0.0318 ± 0.003 |  | 0.0398 ± 0.007 \$ |  | 0.0433 ± 0.007 \$ |  | 0.0374 ± 0.004 |  | 0.0359 ± 0.005    |  | 0.0498 ± 0.004 ‡  |  |
| Ndufs3  | 0.0542 ± 0.006 |  | 0.0580 ± 0.008    |  | 0.0602 ± 0.009    |  | 0.0528 ± 0.006 |  | 0.0702 ± 0.012 \$ |  | 0.0652 ± 0.012 \$ |  |
| Ndufs5  | 0.0485 ± 0.011 |  | 0.0366 ± 0.009    |  | 0.0579 ± 0.005 †  |  | 0.0505 ± 0.007 |  | 0.0562 ± 0.012    |  | 0.0576 ± 0.010    |  |
| Ndufs6  | 0.0803 ± 0.008 |  | 0.1198 ± 0.031 \$ |  | 0.0802 ± 0.015 †  |  | 0.0877 ± 0.010 |  | 0.0824 ± 0.023    |  | 0.0933 ± 0.010    |  |
| Ndufs7  | 0.0838 ± 0.022 |  | 0.0919 ± 0.012    |  | 0.1090 ± 0.023    |  | 0.0799 ± 0.020 |  | 0.1026 ± 0.035    |  | 0.1027 ± 0.018    |  |
| Ndufs8  | 0.0468 ± 0.005 |  | 0.0409 ± 0.007    |  | 0.0466 ± 0.003    |  | 0.0504 ± 0.007 |  | 0.0542 ± 0.006    |  | 0.0481 ± 0.004    |  |
| Ndufv1  | 0.0654 ± 0.005 |  | 0.0463 ± 0.012    |  | 0.0743 ± 0.006    |  | 0.0797 ± 0.025 |  | 0.0932 ± 0.006 \$ |  | 0.0720 ± 0.010    |  |
| Ndufv2  | 0.0735 ± 0.013 |  | 0.0780 ± 0.015    |  | 0.0693 ± 0.012    |  | 0.0658 ± 0.010 |  | 0.0933 ± 0.017 \$ |  | 0.0752 ± 0.007 †  |  |
| SdhA    | 0.0602 ± 0.014 |  | 0.0608 ± 0.011    |  | 0.0688 ± 0.010    |  | 0.0621 ± 0.012 |  | 0.0682 ± 0.017    |  | 0.0741 ± 0.011    |  |
| SdhB    | 0.0822 ± 0.029 |  | 0.0714 ± 0.017    |  | 0.0731 ± 0.010    |  | 0.0494 ± 0.012 |  | 0.0686 ± 0.023    |  | 0.0773 ± 0.013    |  |
| SdhC    | 0.0512 ± 0.013 |  | 0.0518 ± 0.023    |  | 0.0604 ± 0.011    |  | 0.0536 ± 0.019 |  | 0.0509 ± 0.016    |  | 0.0525 ± 0.008    |  |
| Cyc1    | 0.0485 ± 0.002 |  | 0.0466 ± 0.003    |  | 0.0529 ± 0.005    |  | 0.0421 ± 0.008 |  | 0.0512 ± 0.008    |  | 0.0499 ± 0.007    |  |
| Uqcrc1  | 0.0220 ± 0.008 |  | 0.0147 ± 0.011    |  | 0.0261 ± 0.008    |  | 0.0257 ± 0.009 |  | 0.0312 ± 0.013    |  | 0.0285 ± 0.011    |  |
| Uqcrc2  | 0.0295 ± 0.008 |  | 0.0245 ± 0.013    |  | 0.0339 ± 0.007    |  | 0.0431 ± 0.015 |  | 0.0492 ± 0.018    |  | 0.0378 ± 0.006    |  |
| Uqcrb   | 0.0267 ± 0.002 |  | 0.0268 ± 0.002    |  | 0.0377 ± 0.002 ‡  |  | 0.0283 ± 0.003 |  | 0.0357 ± 0.004 \$ |  | 0.0357 ± 0.003 \$ |  |
| Uqcrh   | 0.0432 ± 0.002 |  | 0.0391 ± 0.005    |  | 0.0507 ± 0.003 ‡  |  | 0.0476 ± 0.007 |  | 0.0583 ± 0.006 \$ |  | 0.0465 ± 0.004 ‡  |  |
| Uqcrcf1 | 0.0334 ± 0.007 |  | 0.0527 ± 0.009 \$ |  | 0.0406 ± 0.008    |  | 0.0459 ± 0.012 |  | 0.0568 ± 0.011    |  | 0.0537 ± 0.014    |  |
| Uqcr10  | 0.0588 ± 0.022 |  | 0.0269 ± 0.019    |  | 0.0486 ± 0.016    |  | 0.0462 ± 0.021 |  | 0.0767 ± 0.060    |  | 0.0769 ± 0.027    |  |
| Uqcr11  | 0.0467 ± 0.010 |  | 0.0292 ± 0.014    |  | 0.0572 ± 0.010    |  | 0.0799 ± 0.008 |  | 0.0000 ± 0.000    |  | 0.0503 ± 0.013    |  |
| Mtco1   | 0.0604 ± 0.029 |  | 0.0605 ± 0.051    |  | 0.0606 ± 0.017    |  | 0.0323 ± 0.024 |  | 0.0674 ± 0.036    |  | 0.0673 ± 0.023    |  |
| Mtco2   | 0.0306 ± 0.008 |  | 0.0359 ± 0.008    |  | 0.0355 ± 0.006    |  | 0.0341 ± 0.010 |  | 0.0479 ± 0.013    |  | 0.0406 ± 0.009    |  |
| Cox4i1  | 0.0572 ± 0.007 |  | 0.0629 ± 0.012    |  | 0.0706 ± 0.010    |  | 0.0568 ± 0.009 |  | 0.0668 ± 0.012    |  | 0.0679 ± 0.012    |  |
| Cox5a   | 0.0118 ± 0.006 |  | 0.0019 ± 0.001 \$ |  | 0.0096 ± 0.005 †  |  | 0.0155 ± 0.006 |  | 0.0035 ± 0.002 \$ |  | 0.0000 ± 0.000 ‡  |  |
| Cox5b   | 0.0292 ± 0.014 |  | 0.0318 ± 0.011    |  | 0.0323 ± 0.014    |  | 0.0275 ± 0.011 |  | 0.0436 ± 0.013    |  | 0.0340 ± 0.011    |  |
| Cox6b1  | 0.0531 ± 0.022 |  | 0.0550 ± 0.018    |  | 0.0543 ± 0.020    |  | 0.0492 ± 0.022 |  | 0.0677 ± 0.025    |  | 0.0706 ± 0.031    |  |
| Cox6c   | 0.0680 ± 0.016 |  | 0.0568 ± 0.019    |  | 0.0547 ± 0.009    |  | 0.0505 ± 0.005 |  | 0.0462 ± 0.006    |  | 0.0657 ± 0.005 †  |  |
| Atp5a1  | 0.0494 ± 0.009 |  | 0.0478 ± 0.018    |  | 0.0539 ± 0.010    |  | 0.0402 ± 0.009 |  | 0.0610 ± 0.025    |  | 0.0618 ± 0.011 ‡  |  |
| Atp5b   | 0.0270 ± 0.003 |  | 0.0369 ± 0.008    |  | 0.0337 ± 0.008    |  | 0.0276 ± 0.009 |  | 0.0537 ± 0.015 \$ |  | 0.0388 ± 0.009    |  |
| Atp5c1  | 0.0462 ± 0.012 |  | 0.0421 ± 0.022    |  | 0.0408 ± 0.014    |  | 0.0433 ± 0.017 |  | 0.0392 ± 0.011    |  | 0.0418 ± 0.012    |  |
| Atp5d   | 0.0287 ± 0.006 |  | 0.0258 ± 0.012    |  | 0.0309 ± 0.006    |  | 0.0266 ± 0.008 |  | 0.0479 ± 0.017 \$ |  | 0.0416 ± 0.006 \$ |  |
| Atp5f1  | 0.0318 ± 0.002 |  | 0.0318 ± 0.002    |  | 0.0325 ± 0.002    |  | 0.0255 ± 0.002 |  | 0.0378 ± 0.002 \$ |  | 0.0362 ± 0.003 \$ |  |
| Atp5h   | 0.0329 ± 0.008 |  | 0.0371 ± 0.017    |  | 0.0330 ± 0.008    |  | 0.0384 ± 0.009 |  | 0.0502 ± 0.020    |  | 0.0448 ± 0.006    |  |
| Atp5i   | 0.0245 ± 0.015 |  | 0.0279 ± 0.025    |  | 0.0195 ± 0.017    |  | 0.0258 ± 0.013 |  | 0.0348 ± 0.029    |  | 0.0244 ± 0.010    |  |
| Atp5j2  | 0.0365 ± 0.005 |  | 0.0289 ± 0.005 \$ |  | 0.0348 ± 0.004 †  |  | 0.0310 ± 0.005 |  | 0.0449 ± 0.003 \$ |  | 0.0386 ± 0.003 ‡  |  |
| Atp5l   | 0.0627 ± 0.015 |  | 0.0469 ± 0.010 \$ |  | 0.0580 ± 0.009    |  | 0.0415 ± 0.005 |  | 0.0631 ± 0.014 \$ |  | 0.0669 ± 0.010 \$ |  |
| Atp5o   | 0.0326 ± 0.005 |  | 0.0406 ± 0.007    |  | 0.0409 ± 0.008    |  | 0.0352 ± 0.006 |  | 0.0506 ± 0.015 \$ |  | 0.0467 ± 0.006 \$ |  |

**Supplemental Table 3:** The relative abundance of mitochondrial ETS proteins in the soleus. Data were analyzed by two-way ANOVA (group x treatment) and are represented as mean from 5-7 rats per group. Data are in mean ± SD where \$ indicates a significant difference from CON, † indicates a significant difference from MET and ‡ indicates significant differences from CON and MET.
