# Supplementary material for: Metformin treatment results in distinctive skeletal muscle mitochondrial remodeling in rats with different intrinsic aerobic capacities
Source: PubMed Central journal article supplement (PMC11488331; doi:10.1111/acel.14235), 2024-06-24
Supplement: ACEL-23-e14235-s007.pdf [file ACEL-23-e14235-s007.pdf]

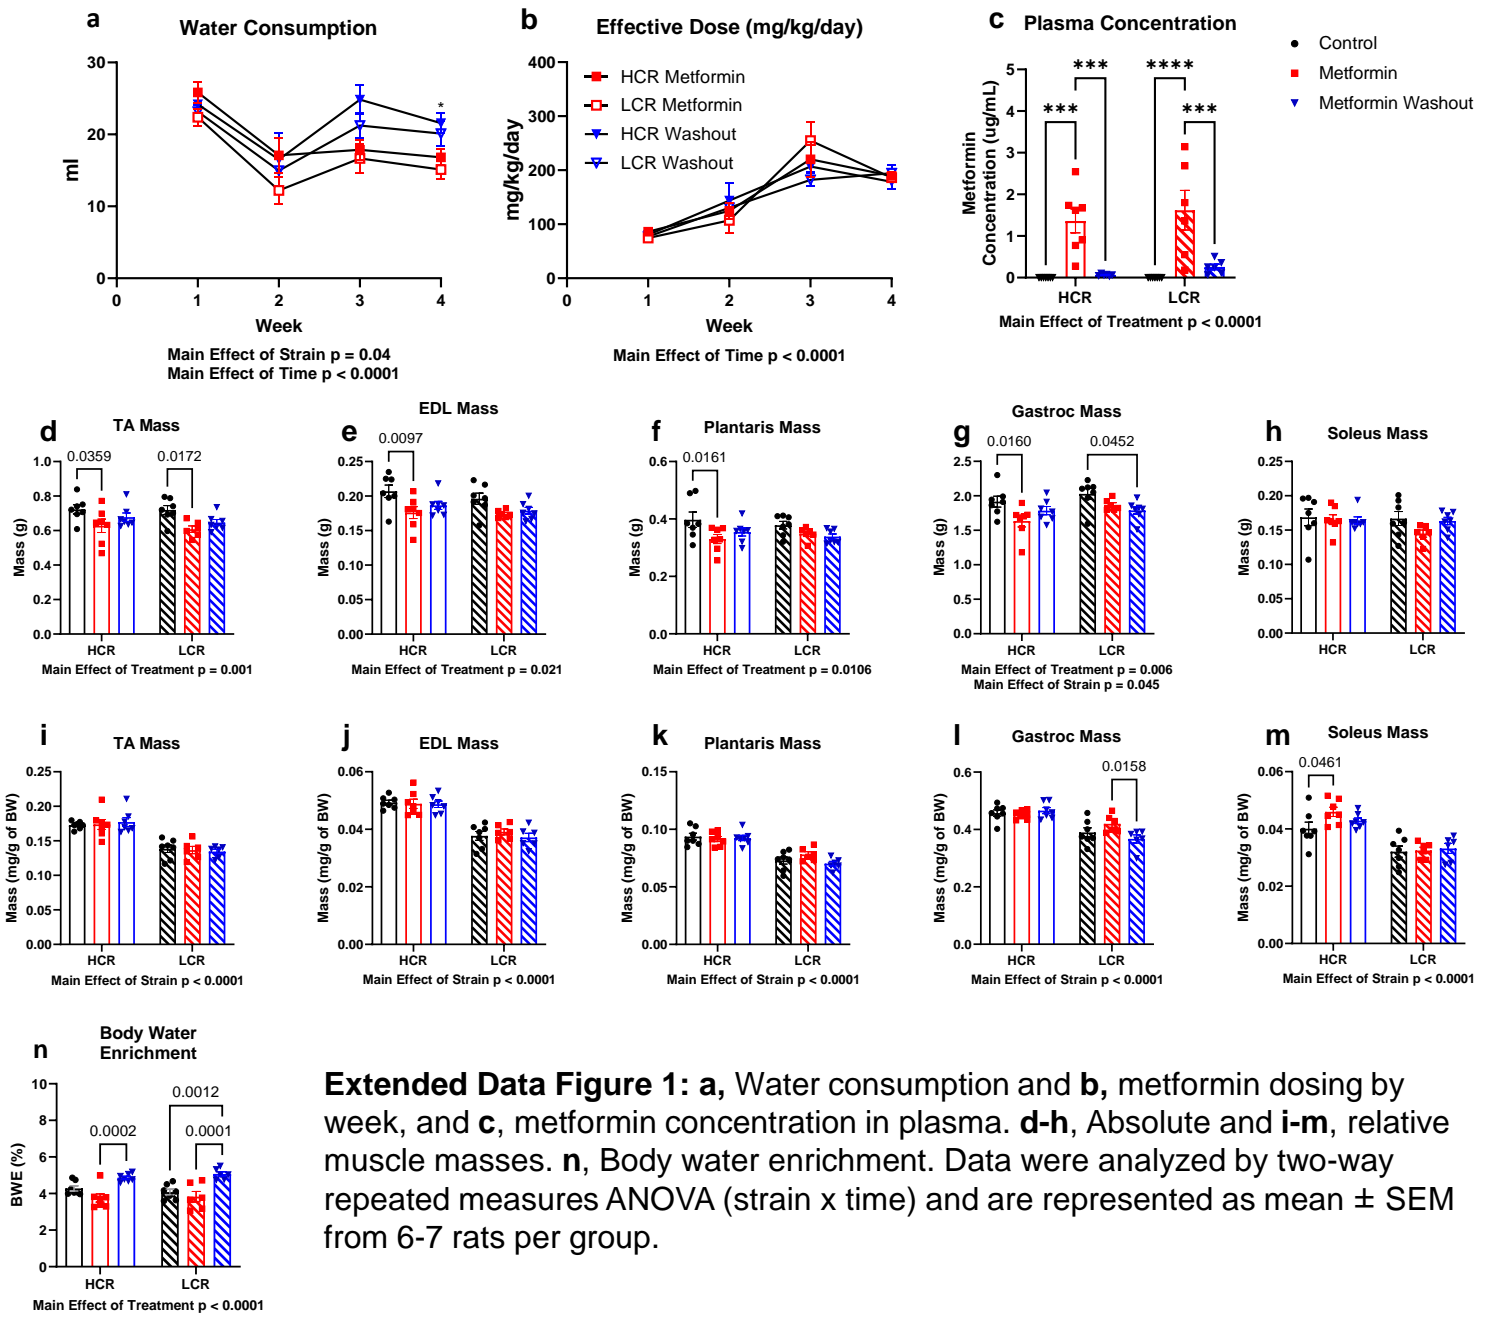

**Extended Data Figure 1: a**, Water consumption and **b**, metformin dosing by week, and **c**, metformin concentration in plasma. **d-h**, Absolute and **i-m**, relative muscle masses. **n**, Body water enrichment. Data were analyzed by two-way repeated measures ANOVA (strain x time) and are represented as mean  $\pm$  SEM from 6-7 rats per group.
